# Supplementary material for: Fitness Trade-Offs in Competence Differentiation of Bacillus subtilis
Source: PubMed Central journal article supplement (PMC4896167; doi:10.3389/fmicb.2016.00888), 2016-06-07
Supplement: DataSheet1.pdf [file DataSheet1.pdf]

1 *Supplementary Figures for*

2

3 **Fitness trade-offs in competence differentiation of *Bacillus subtilis***

4

5 Melih Yüksel, Jeffrey J. Power, Jan Ribbe, Thorsten Volkmann, Berenike Maier\*

6 Department of Physics, University of Cologne

7

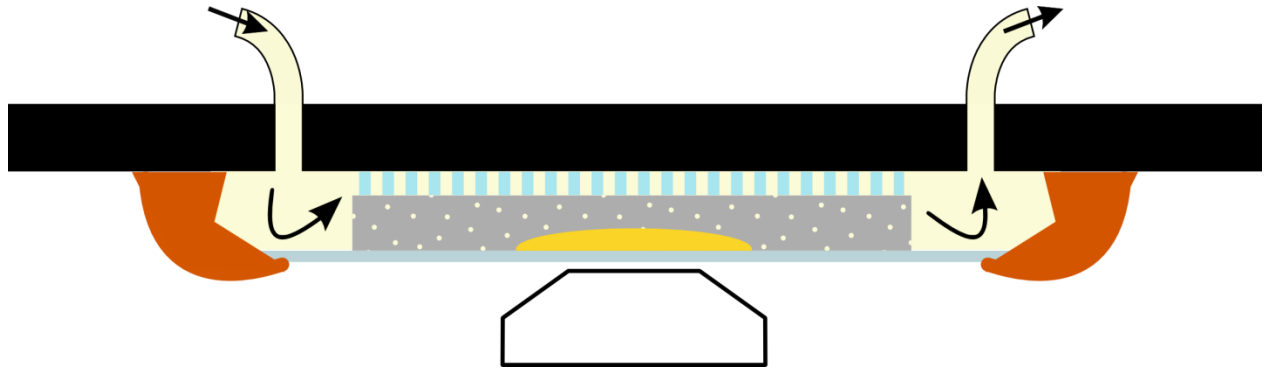

8

9 **Fig. S1 Layout of the flow chamber.** The sample (yellow) is sandwiched between a glass cover  
10 slide (light gray) and a porous gel (dark gray, in our setup either a PBS/agar gel or a  
11 polyacrylamide gel). The porous gel allows signaling molecules and nutrients from the medium  
12 (cream) to diffuse through to the sample but not bacteria. The porous gel rests on an array of  
13 PDMS pillars (blue) to hold the gel fixed on the cover slide. The PDMS pillars are attached to the  
14 chamber lid (black) which contains two outlets, allowing for flow injections. The cover slide is  
15 sealed to the chamber lid using picodent twinsil silicone (orange).

16

17

18

19

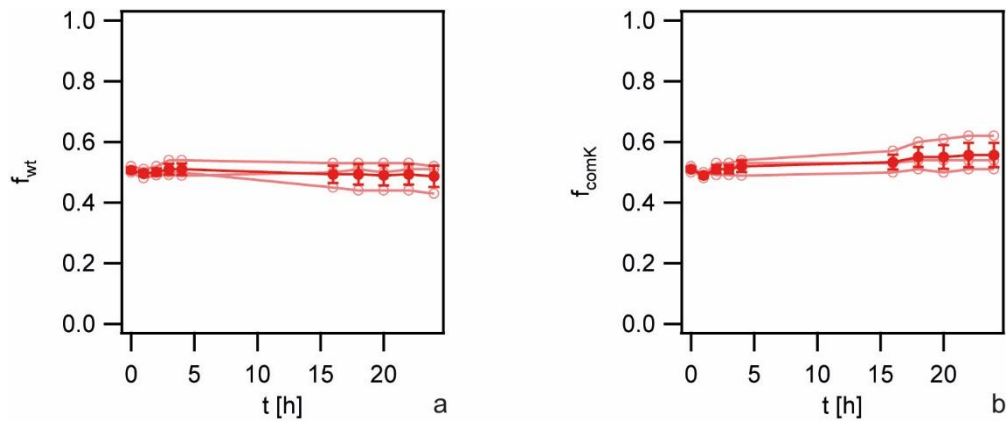

20

21 **Fig. S2 *gfp* reporter does not affect the competition dynamics.** Competitors were grown  
22 separately to  $T_2$ , diluted into fresh competence medium, and mixed in a 1:1 ratio. Red lines:  
23 fraction of competitor with higher probability of competence differentiation. Open circles: three  
24 independent experiments, closed circles: average and standard deviation. a) Fraction of wt  
25 (BD630) cells competed against wt *gfp* (Bs139) cells. b) Fraction of  $\Delta comK$  (Bs075) cells  
26 competed against  $\Delta comK$  *gfp* (Bs140) cells.

27

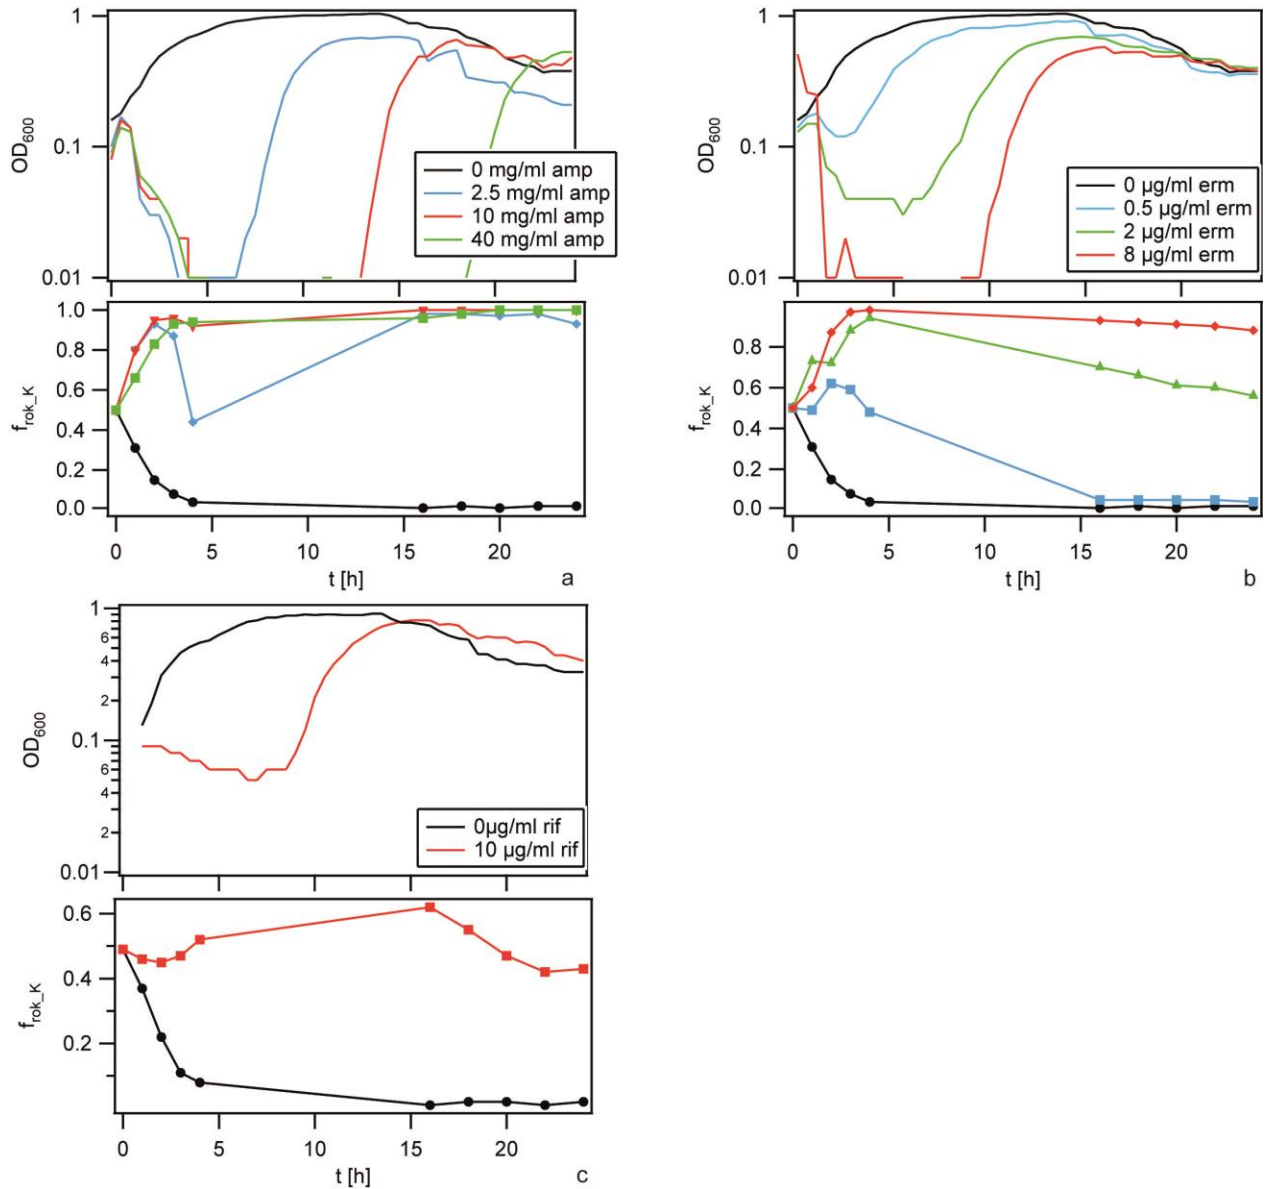

28  
 29 **Fig. S3 Additional examples for benefit of competence during transient exposure to**  
 30 **ampicillin and erythromycin.** Competition experiment between  $\Delta rok$  (Bs056) and  $\Delta comK gfp$   
 31 (Bs140). Competitors were grown separately to T<sub>2</sub>, diluted into fresh competence medium  
 32 containing a) ampicillin, b) erythromycin, c) rifampicin as detailed in the graphs, and mixed in a  
 33 1:1 ratio, as outlined in competition assay during outgrowth. At  $t = 1$  h, antibiotics were washed  
 34 out and fresh competence medium was added. Upper graphs: growth curves (optical density);  
 35 monitoring started at 1 h. Lower graphs: fraction of  $\Delta rok$  cells competing against non-competent  
 36  $\Delta comK gfp$  cells, obtained from flow cytometry. These graphs are additional examples (from  
 37 different days) of the experiments shown in Fig. 4d, Fig. 5d, and Fig. 6d respectively.

38

39

40

41

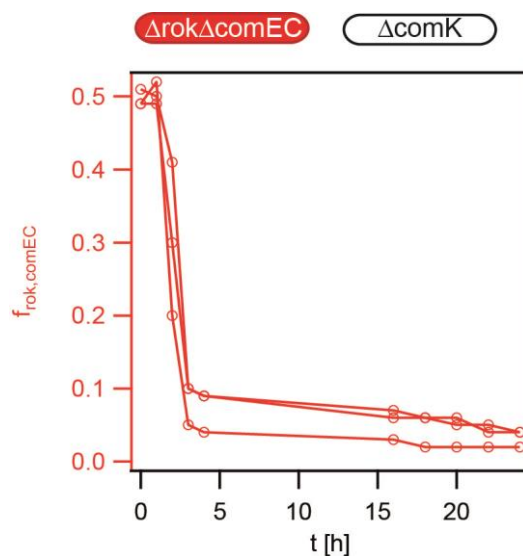

42

43 **Fig. S4 The ability to transform does not affect the fitness cost of the  $\Delta rok$  strain.** The  
44 competitors  $\Delta rok \Delta comEC$  (Bs144) and  $\Delta comK$  *gfp* (Bs140) were grown separately to  $T_2$ , diluted  
45 into fresh competence medium, and mixed in a 1:1 ratio. Red lines with open circles: fraction of  
46  $\Delta rok \Delta comEC$  cells. Results of three independent experiments are shown.

47

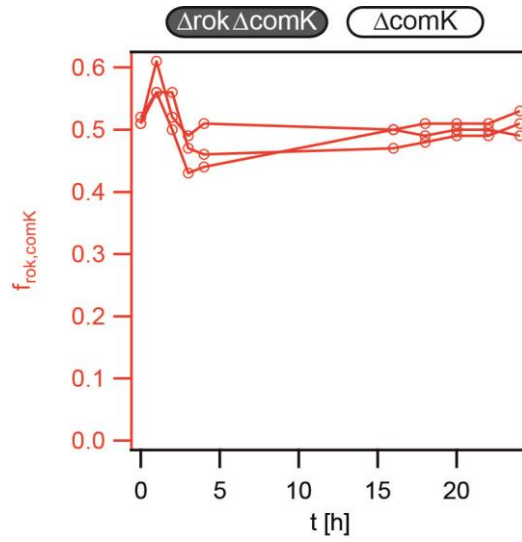

48

49 **Fig. S5 The cost of *rok* deletion is related to differentiation into the K-state.** The competitors  
 50 *ΔrokΔcomK* (Bs142) and *ΔcomK gfp* (Bs140) were grown separately to T<sub>2</sub>, diluted into fresh  
 51 competence medium, and mixed in a 1:1 ratio. Red lines with open circles: fraction of  
 52 *ΔrokΔcomK* cells. Results of three independent experiments are shown.

53

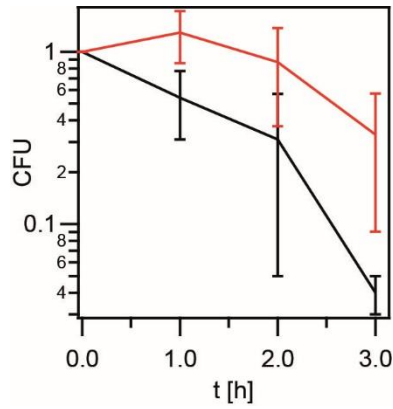

54

55 **Fig. S6 Time-kill kinetics in the presence of 0.5 mg/ml ampicillin.** Relative number of colony-  
56 forming units (CFU) during ampicillin treatment. Cells were diluted and plated onto agar-plates  
57 without antibiotics at different time points. The number of colonies was evaluated after 16 h.  
58 Black:  $\Delta comK$  (Bs075), red:  $\Delta rok$  (Bs056), error bars: standard deviation of three independent  
59 experiments.

60

61

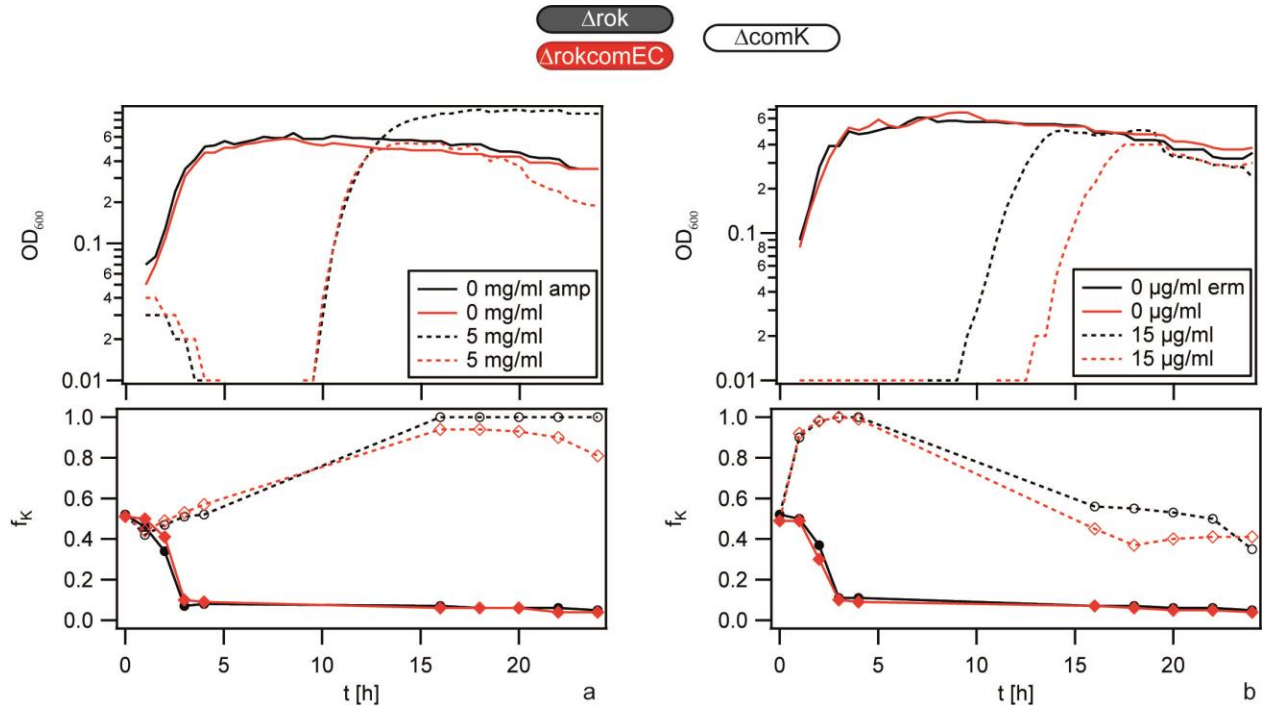

62

63 **Fig. S7 The benefit of the K-state does not require transformation.** Competitors were grown  
 64 separately to T<sub>2</sub>, diluted into fresh competence medium containing antibiotics as detailed in the  
 65 graphs, and mixed in a 1:1 ratio. At  $t = 1$  h, antibiotics were washed out and fresh competence  
 66 medium was added. Upper graphs: growth curves (optical density of both competitors). Lower  
 67 graphs: fraction of  $\Delta rok$  (Bs056, black),  $\Delta rok\Delta comEC$  (Bs144, red) cells competing against non-  
 68 competent  $\Delta comK gfp$  (Bs140) cells. a) amp: ampicillin, b) erm: erythromycin. Each graph is a  
 69 representative result of at least three independent experiments.

70

71



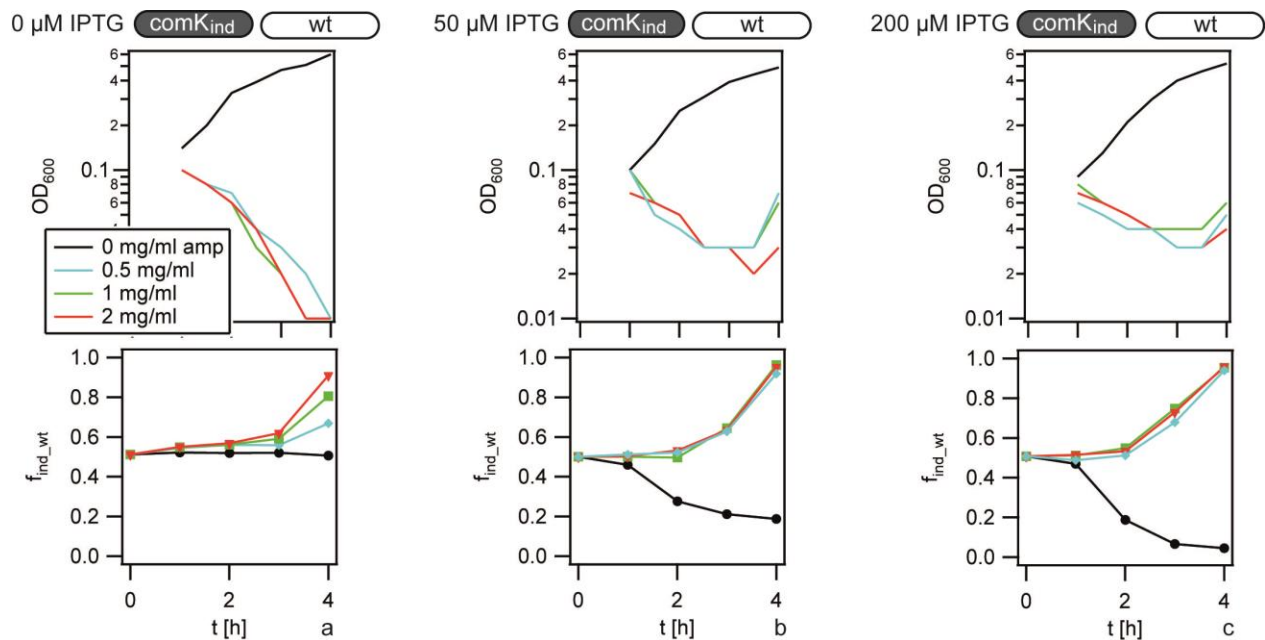

72

73 **Fig. S8 Competition dynamics of *wt* and strain with variable *comK* induction.** Competitors  
 74 were grown separately for 2.5 h and induced with IPTG, as outlined in competition assay with  
 75 IPTG-inducible *comK*. After IPTG was washed out, competitors were diluted into fresh  
 76 competence medium containing ampicillin as detailed in the graphs, and mixed in a 1:1 ratio. At  $t$   
 77 = 1 h, antibiotics were washed out and fresh competence medium was added. Upper graphs:  
 78 growth curves (optical density of both competitors); monitoring started at 1 h. Lower graphs:  
 79 fraction of *comK<sub>ind</sub>* (BD3836) cells competing against *wt* *gfp* (Bs139) cells, obtained from flow  
 80 cytometry. a) No induction, b) 50  $\mu$ M IPTG, c) 200  $\mu$ M IPTG. Each graph is a representative  
 81 result of at least three independent experiments.

82
